# Supplementary material for: Inferring species trees from incongruent multi-copy gene trees using the Robinson-Foulds distance
Source: PubMed Central journal article supplement (PMC3874668; doi:10.1186/1748-7188-8-28), 2013-11-01
Supplement: 1748-7188-8-28-S1.pdf [file 1748-7188-8-28-S1.pdf]

# Additional file 1: Inferring Species Trees from Incongruent Multi-Copy Gene Trees Using the Robinson-Foulds Distance

## 1 Computing the RF Distance between two mul-trees is NP-complete

The NP-completeness proof is by reduction from the following NP-complete problem [1].

*Problem 1 (Exact Cover by 3-Sets (X3C))*

*Input:*  $S := \{s_1, \dots, s_n\}$ , where  $n = 3q$ , and  $C := \{C_1, \dots, C_m\}$  such that  $C_i = \{s_{i_1}, s_{i_2}, s_{i_3}\}$ .

*Output:* Are there exist sets  $C_{i_1}, \dots, C_{i_q}$  such that  $\bigcup_{j=1}^q C_{i_j} = S$  ?

Note that X3C remains NP-complete even when each element of  $S$  occurs in *exactly* three subsets in  $C$  and thus  $m = n = 3q$  [2]. We use this version of X3C in our reduction. For a given instance of the X3C problem, we construct two mul-trees  $\mathcal{T}_1$  and  $\mathcal{T}_2$  on the same set of labels and with matching label multiplicities, such that transforming  $\mathcal{T}_1$  into  $\mathcal{T}_2$  (or vice versa) requires  $\kappa$  (to be specified later) contractions and refinements if and only if an exact cover of  $S$  exists.

Mul-trees  $\mathcal{T}_1$  and  $\mathcal{T}_2$  are constructed in the following way. For each  $s_i \in S$ , we construct two rooted, binary singly-labeled trees  $\mathbb{T}$  and  $\mathbb{T}'$  on the same set of labels that take a “large” number of contractions and refinements to transform into each other (see Fig. 1). Let  $k$  and  $t$  be two positive integers such that  $k + 2 \geq n^2$  and  $k + 2 = 2^t$ ;  $\mathbb{T}$  and  $\mathbb{T}'$  are on the same  $(k + 2)$ -element leaf label set.  $\mathbb{T}'$  has the same underlying tree as  $\mathbb{T}$  but different labeling map. In particular, for each cherry<sup>1</sup>  $(x, y)$  in  $\mathbb{T}$ ,  $x$  and  $y$  are in different clusters  $C_{\mathbb{T}'}(u)$  and  $C_{\mathbb{T}'}(v)$  in  $\mathbb{T}'$ , where  $u$  and  $v$  are two children of the root in the underlying tree of  $\mathbb{T}'$ . Both  $\mathbb{T}$  and  $\mathbb{T}'$  have unique leaf labels for each  $s_i \in S$ .

**Lemma 1.**  $RF(\mathbb{T}, \mathbb{T}') = 2k$ .

*Proof.*  $RF(\mathbb{T}, \mathbb{T}') = 2|\mathcal{H}(\mathbb{T}) \setminus \mathcal{H}(\mathbb{T}')|$ , since  $\mathbb{T}$  and  $\mathbb{T}'$  are binary singly-labeled trees. Further, since  $\mathbb{T}$  and  $\mathbb{T}'$  are on the same set of  $k + 2$  labels,  $\mathcal{H}(\mathbb{T}) = \mathcal{H}(\mathbb{T}') = k$ . Thus, it suffices to show that no cluster in  $\mathbb{T}$  matches any cluster in  $\mathbb{T}'$ , but this follows directly from the construction.  $\square$

---

<sup>1</sup>In a phylogenetic tree  $\mathcal{T} = (T, \phi)$  on  $X$ , a pair of leaf labels  $(a, b)$  forms a cherry if  $\phi^{-1}(a)$  and  $\phi^{-1}(b)$  are adjacent to the same internal vertex in  $T$ .

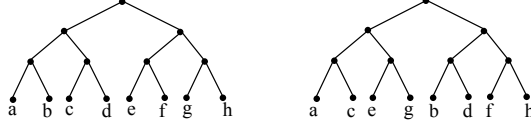

Figure 1: Two possible singly-labeled trees  $\mathbb{T}$  and  $\mathbb{T}'$  on an 8-element label set. The RF distance between  $\mathbb{T}$  and  $\mathbb{T}'$  is 12.

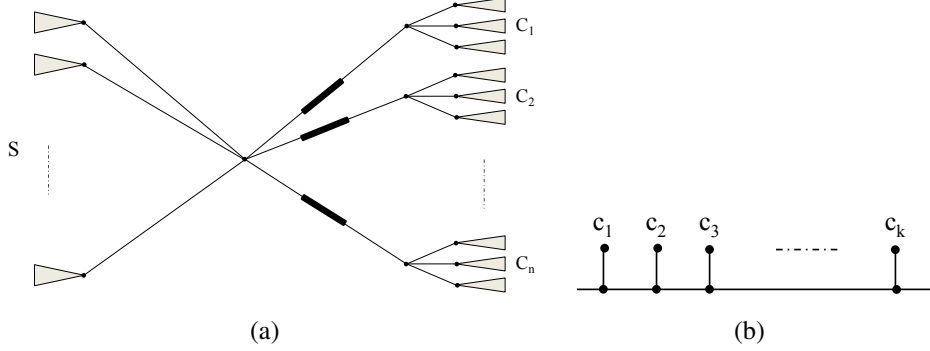

Figure 2: (a) Structure of mul-tree  $\mathcal{T}_1$  and (b) a toll sequence of  $k$  leaves.

We now describe the construction of  $\mathcal{T}_1$  and  $\mathcal{T}_2$ . Let  $n = 3q$ . Figure 2(a) outlines the structure of  $\mathcal{T}_1$ . The solid rectangles represent *toll* sequences of  $k$  uniquely labeled leaves. The toll sequence is a caterpillar tree, where leaf vertices of both ends are in fact the two internal vertices (the center vertex of degree  $2n$  and degree-four vertex corresponding to a  $C_i$  ( $1 \leq i \leq n$ )) in the underlying tree of  $\mathcal{T}_1$  (Fig. 2(b)). The left side of  $\mathcal{T}_1$  has  $n$  triangles, one for each of the  $n$  elements in  $S$ . Each triangle represents a phylogenetic tree  $\mathbb{T}$  corresponding to each  $s_i \in S$ , connecting through its root. The right side of  $\mathcal{T}_1$  has  $n$  sets of three triangles corresponding to the subsets in  $C$ ; for each subset  $C_i = \{s_{i_1}, s_{i_2}, s_{i_3}\}$ , the triangles represent three phylogenetic trees  $\mathbb{T}'$ 's, corresponding to each  $s_{i_j}$  ( $1 \leq j \leq 3$ ), connected through their roots.

The structure of mul-tree  $\mathcal{T}_2$  is similar to that of  $\mathcal{T}_1$ , except that  $\mathcal{T}_2$  has  $\mathbb{T}'$  for each  $s_i \in S$  and  $\mathbb{T}$  for each element of  $C_i \in C$  ( $1 \leq i \leq n$ ). Thus,  $\mathcal{T}_2$  has  $\mathbb{T}'$ 's on the left side and  $\mathbb{T}$ 's on the right side, the opposite of  $\mathcal{T}_1$ .

**Lemma 2.**  $\mathcal{T}_1$  and  $\mathcal{T}_2$  can be constructed in polynomial time.

*Proof.*  $\mathbb{T}$  and  $\mathbb{T}'$  have the leaf label set of  $k + 2$  elements. Both  $\mathbb{T}$  and  $\mathbb{T}'$  can be constructed in polynomial time, and so can their  $8n$  copies ( $4n$  for  $\mathcal{T}_1$  and  $4n$  for  $\mathcal{T}_2$ ). Further, the  $2n$  toll sequences ( $n$  for  $\mathcal{T}_1$  and  $n$  for  $\mathcal{T}_2$ ) can be constructed in polynomial time. The number of remaining vertices in  $\mathcal{T}_1$  and  $\mathcal{T}_2$  is constant.  $\square$

The connection between exactly covering  $S$  and transforming  $\mathcal{T}_1$  into  $\mathcal{T}_2$  by contractions and refinements is as follows: To transform  $\mathcal{T}_1$  into  $\mathcal{T}_2$ , we need to convert each  $\mathbb{T}$  on the left into  $\mathbb{T}'$  and each  $\mathbb{T}'$  on the right into  $\mathbb{T}$ . From Lemma 1, this costs  $24qk$  contractions and refinements. A rather clever technique is to swap  $3q$   $\mathbb{T}$ 's on the left with their counterparts on the right and to transform the remaining  $6q$   $\mathbb{T}'$ 's on the right into  $\mathbb{T}$ 's. If an exact cover  $C_{i_1}, \dots, C_{i_q}$  of  $S$  exists, we can partition

the  $3q$   $\mathbb{T}$ s into  $q$  groups according to the cover. For each  $C_j$  ( $j = i_1, \dots, i_q$ ) in the cover, we swap the corresponding group of phylogenetic trees for sequences  $s_{j_1}, s_{j_2}, s_{j_3}$  with their counterparts.

**Lemma 3.** *All  $\mathbb{T}'$ s for each  $C_j$  ( $j = i_1, \dots, i_q$ ) can be swapped with corresponding  $\mathbb{T}$ s by  $2(k + 1)$  contractions and refinements.*

*Proof.* Take the toll sequence corresponding to  $C_j$  and contract its  $k + 1$  edges; i.e.,  $(k - 1)$  internal edges and 2 edges at both the sides of the toll sequence. Now refine it so that the corresponding  $\mathbb{T}$ s move in  $C_j$  and the  $\mathbb{T}'$ s stay on the left. This takes  $2(k + 1)$  contractions and refinements.  $\square$

From Lemma 3, if an exact cover of  $S$  exists, then  $6q$  phylogenetic trees can be transformed by  $2q(k + 1)$  contractions and refinements. The remaining  $6q$   $\mathbb{T}'$ s can be transformed into  $\mathbb{T}$ s by  $12kq$  contractions and refinements. Let  $\kappa = 2q(k + 1) + 12kq$ . We have the next lemma.

**Lemma 4.** *If set  $S$  has an exact cover, then  $RF(\mathcal{T}_1, \mathcal{T}_2) = \kappa$ .*

**Lemma 5.** *If set  $S$  has no exact cover, then  $RF(\mathcal{T}_1, \mathcal{T}_2) > \kappa$ .*

*Proof.* Observe that to transform the  $6q$   $\mathbb{T}'$ s, in the right side of  $\mathcal{T}_1$  into their respective  $\mathbb{T}$ s, we need at least  $\kappa_2 = 12kq$  contraction and refinements, whether or not there is an exact cover. We claim that if  $S$  has no exact cover, then the number of additional contractions and refinements required, which we denote by  $\kappa_1$ , is greater than  $2q(k + 1)$ .

If set  $S$  has an exact cover, then the  $3q$   $\mathbb{T}$ s on the left and the  $3q$   $\mathbb{T}'$ s on the right side of  $\mathcal{T}_1$  can be converted into their counterparts by one of the two ways:

- **Swapping more than  $q$  triplets.** Let  $q + \sigma$  triplets cover all elements in  $S$  (with some repeated elements). Now swapping  $3q$   $\mathbb{T}$  with corresponding  $\mathbb{T}'$  in  $q + \sigma$  triplets will require  $2(q + \sigma)(k + 1)$  contractions and refinements. Thus,  $\kappa_1 = 2(q + \sigma)(k + 1)$ .
- **Swapping  $q$  triplets.** Let  $C_{i_1}, \dots, C_{i_q}$  be the best  $q$  triplets that cover all but  $\sigma$  elements in  $S$ . Swapping these  $q$  triplets only converts  $n - \sigma$   $\mathbb{T}$ s and  $\mathbb{T}'$ s into their counterparts. Rest  $2\sigma$   $\mathbb{T}$ s and  $\mathbb{T}'$ s need to be converted manually. Thus,  $\kappa_1 = 2q(k + 1) + \langle 2\sigma \text{ manual conversions} \rangle$ .

Both the above ways yield a  $\kappa_1 > q(k + 1)$ . The total number of contractions and refinements is  $\kappa_1 + \kappa_2$ , which is greater than  $\kappa$ .  $\square$

We have the next theorem.

**Theorem 1.** *Set  $S$  has an exact cover if and only if  $RF(\mathcal{T}_1, \mathcal{T}_2) = \kappa$ .*

## References

- [1] M. R. Garey and D. S. Johnson. *Computers and Intractability: A guide to the theory of NP-completeness*. W. H. Freeman, New York, 1979.
- [2] G. Hickey, F. Dehne, A. Rau-Chaplin, and C. Blouin. SPR distance computation for unrooted trees. *Evolutionary Bioinformatics*, 4:17–27, 2008.
