# Supplementary material for: Inferring species trees from incongruent multi-copy gene trees using the Robinson-Foulds distance
Source: Springer Nature journal article supplement (doi:10.1186/1748-7188-8-28), 2013-11-01

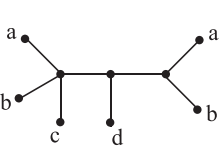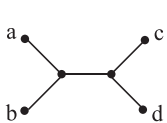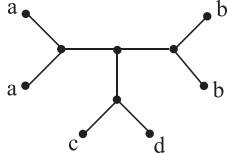

Supplement: 13015_2013_232_MOESM4_ESM.pdf [file 13015_2013_232_MOESM4_ESM.pdf]
