# Supplementary material for: Inferring species trees from incongruent multi-copy gene trees using the Robinson-Foulds distance
Source: Springer Nature journal article supplement (doi:10.1186/1748-7188-8-28), 2013-11-01

50 taxa

100 taxa

■ Only-dup  
■ Dup-loss  
● SPRS  
● MulRF

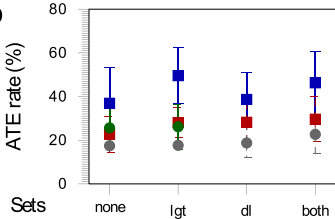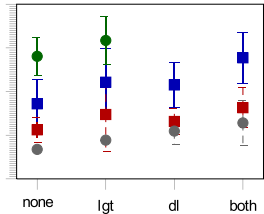

Supplement: 13015_2013_232_MOESM9_ESM.pdf [file 13015_2013_232_MOESM9_ESM.pdf]
